# Supplementary material for: Characterization of transport from the Asian summer monsoon anticyclone into the UTLS via shedding of low potential vorticity cutoffs
Source: Copernicus journal article supplement (doi:10.5194/acp-22-3841-2022), 2022-03-23
Supplement: Supplementary file 1 [file acp-22-3841-2022-supplement.zip]

Archive with 4 entries (4 files):
- acp-22-3841-2022-supplement-title-page.pdf
- fig2_animation_direct.avi
- fig3_animation_indirect.avi
- fig10_animation_direct.avi
