# Supplementary material for: Characterization of transport from the Asian summer monsoon anticyclone into the UTLS via shedding of low potential vorticity cutoffs
Source: Copernicus journal article supplement (doi:10.5194/acp-22-3841-2022), 2022-03-23
Supplement: Supplementary file 1 [file acp-22-3841-2022-supplement.zip › acp-22-3841-2022-supplement-title-page.pdf]

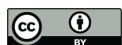

*Supplement of*

## **Characterization of transport from the Asian summer monsoon anticyclone into the UTLs via shedding of low potential vorticity cutoffs**

**Jan Clemens et al.**

*Correspondence to:* Jan Clemens ([j.clemens@fz-juelich.de](mailto:j.clemens@fz-juelich.de))

- [acp-22-3841-2022-supplement-title-page.pdf](#)
- [fig10\\_animation\\_direct.avi](#)
- [fig2\\_animation\\_direct.avi](#)
- [fig3\\_animation\\_indirect.avi](#)

The copyright of individual parts of the supplement might differ from the article licence.
